# Supplementary material
Source: ML conference proceedings conference paper supplement (https://proceedings.mlr.press/v161/di-mauro21a.html)
Supplement: Supplementary file [file di-mauro21a-supp.pdf]

## Random Probabilistic Circuits (Supplementary material)

Nicola Di Mauro<sup>1,4</sup>

Gennaro Gala<sup>1,4</sup>

Marco Iannotta<sup>1</sup>

Teresa M.A. Basile<sup>2,3</sup>

<sup>1</sup>Department of Computer Science, University of Bari, Bari, Italy

<sup>2</sup>Department of Physics, University of Bari, Bari, Italy

<sup>3</sup>National Institute for Nuclear Physics (INFN), Bari Division, Bari, Italy

<sup>4</sup>Eindhoven University of Technology, The Netherlands

### A AN EXAMPLE OF DETERMINISTIC AND STRUCTURED DECOMPOSABLE XPC

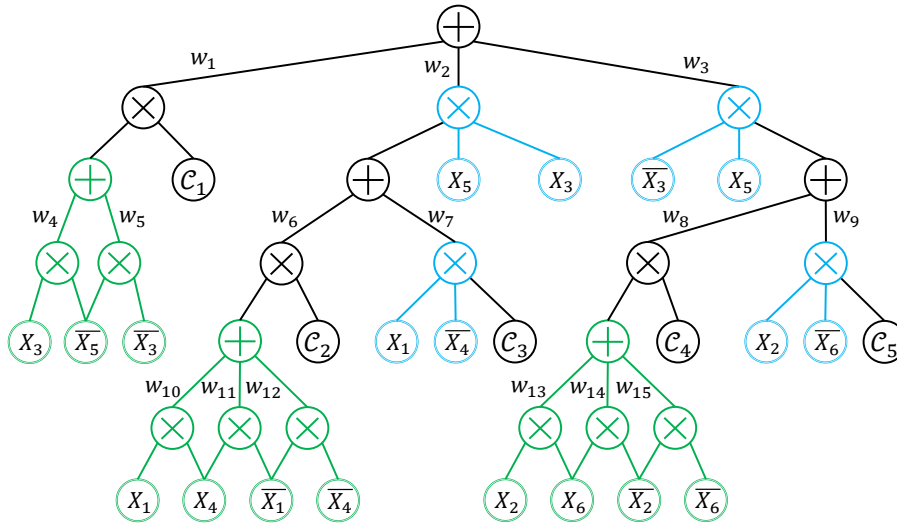

Figure 2: A deterministic and non-SD XPC learned setting  $l = 2$  and  $k = 3$  over RVs  $\mathbf{X} = \{X_i\}_{i=1}^7$ . The sub-circuits in blue (resp., green) encode  $\mathcal{Q}$ -regions (resp.,  $\mathcal{R}$ -regions). Every CLT (represented as a multivariate node  $\mathcal{C}_i$ ) is learned by following the traditional Chow-Liu tree algorithm [Chow and Liu, 1968].

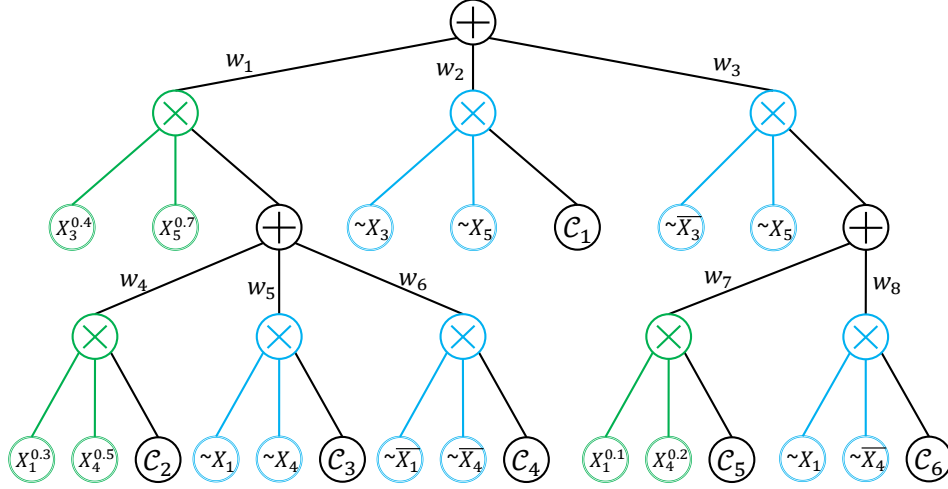

Figure 3: A non-deterministic and SD XPC learned setting  $l = 2$  and  $k = 3$  over RVs  $\mathbf{X} = \{X_i\}_{i=1}^7$ . The sub-circuits in blue (resp., green) encode  $\mathcal{Q}$ -regions (resp.,  $\mathcal{R}$ -regions).  $\sim X_i$  denotes the smoothed indicator of  $X_i$  and  $X_i^p$  denotes a Bernoulli node of  $X_i$  with parameter  $p$ . The CLTs (represented as multivariate nodes  $\mathcal{C}_i$ ) have the same dependency tree—are normalized for the same vtree.

## B PROOF OF THEOREM 1.

We recall from [Chow and Liu, 1968] that the best first-order dependency tree  $\widehat{\mathcal{T}}$  over a set of RVs  $\mathbf{X} = \{X_i\}_{i=1}^d$  is:

$$\widehat{\mathcal{T}} = \arg \max_{\mathcal{T}} \sum_{i=1}^d \text{MI}(X_i, X_{\tau(i)}), \quad (1)$$

where  $X_{\tau(i)}$  is the parent of  $X_i$  in  $\mathcal{T}$ . Let  $\{p_k\}_{k=1}^n$  be probability distributions on  $\mathbf{X}$  and  $\{q_k\}_{k=1}^n$  their corresponding approximations based on a same first-order dependency tree  $\mathcal{T}$ . We want to find  $\widehat{\mathcal{T}}$  such that:

$$\widehat{\mathcal{T}} = \arg \min_{\mathcal{T}} \sum_{k=1}^n \mathbb{KL}(p_k || q_k) = \arg \max_{\mathcal{T}} \sum_{k=1}^n \mathbb{E}_{\mathbf{x} \sim p_k} [\log q_k(\mathbf{x})], \quad (2)$$

where  $\mathbb{KL}$  denotes the Kullback-Leibler divergence. Thus considering a dependency tree  $\mathcal{T}$ :

$$\sum_{k=1}^n \mathbb{E}_{\mathbf{x} \sim p_k} [\log q_k(\mathbf{x})] = \sum_{k=1}^n \mathbb{E}_{\mathbf{x} \sim p_k} \left[ \sum_{i=1}^d \log p_k(X_i | X_{\tau(i)}) \right] \quad (3)$$

$$= \sum_{k=1}^n \left( \sum_{i=1}^d \text{MI}_k(X_i; X_{\tau(i)}) + \mathbb{E}_{\mathbf{x} \sim p_k} \left[ \sum_{i=1}^d \log p_k(X_i) \right] \right), \quad (4)$$

where  $\text{MI}_k(X, Y)$  is the mutual information of  $X$  and  $Y$  on  $p_k$ . Therefore:

$$\widehat{\mathcal{T}} = \arg \min_{\mathcal{T}} \sum_{k=1}^n \mathbb{KL}(p_k || q_k) = \arg \max_{\mathcal{T}} \sum_{k=1}^n \sum_{i=1}^d \text{MI}_k(X_i; X_{\tau(i)}). \quad (5)$$

## C TWENTY DENSITY ESTIMATION DATASETS

We report in Table 3 the adopted 20 real-world density estimation datasets [Haaren and Davis, 2012] and their statistics, already used to evaluate different tractable density estimators.

Table 3: Standard benchmark datasets and their statistics.

| DATASET    | RVS  | TRAIN  | VALID | TEST  |
|------------|------|--------|-------|-------|
| NLTCS      | 16   | 16181  | 2157  | 3236  |
| MSNBC      | 17   | 291326 | 38843 | 58265 |
| KDD        | 64   | 180092 | 19907 | 34955 |
| PLANTS     | 69   | 17412  | 2321  | 3482  |
| AUDIO      | 100  | 15000  | 2000  | 3000  |
| JESTER     | 100  | 9000   | 1000  | 4116  |
| NETFLIX    | 100  | 15000  | 2000  | 3000  |
| ACCIDENTS  | 111  | 12758  | 1700  | 2551  |
| RETAIL     | 135  | 22041  | 2938  | 4408  |
| PUMSB-STAR | 163  | 12262  | 1635  | 2452  |
| DNA        | 180  | 1600   | 400   | 1186  |
| KOSAREK    | 190  | 33375  | 4450  | 6675  |
| MSWEB      | 294  | 29441  | 3270  | 5000  |
| BOOK       | 500  | 8700   | 1159  | 1739  |
| EACHMOVIE  | 500  | 4525   | 1002  | 591   |
| WEBKB      | 839  | 2803   | 558   | 838   |
| ROUTERS-52 | 889  | 6532   | 1028  | 1540  |
| 20NEWS-GRP | 910  | 11293  | 3764  | 3764  |
| BBC        | 1058 | 1670   | 225   | 330   |
| AD         | 1556 | 2461   | 327   | 491   |

## D SINGLE MODELS

### D.1 DENSITY ESTIMATION PERFORMANCES

We compare all the variants of XPCs. The average test-set log-likelihood is reported in Table 4

Table 4: Means and standard deviations of the best average test-set log-likelihoods over 40 runs for each variant of XPCs type in the space formed by  $l = \{1, 2, 3\}$ ,  $k = \{2, 3, 4, 8\}$  and  $\delta = \{16, 32, 64, 128, 256, 512\}$ . For every dataset, each row corresponds (from top to down) to XPC, XPC<sub>Det</sub>, XPC<sup>SD</sup> and XPC<sub>Det</sub><sup>SD</sup>. For each model (row) we report the best value in bold.

|       | $l = 1$<br>$k = 2$ | $l = 2$<br>$k = 2$ | $l = 2$<br>$k = 3$ | $l = 2$<br>$k = 4$ | $l = 3$<br>$k = 2$ | $l = 3$<br>$k = 3$ | $l = 3$<br>$k = 4$ | $l = 3$<br>$k = 8$ |
|-------|--------------------|--------------------|--------------------|--------------------|--------------------|--------------------|--------------------|--------------------|
| NLTCS | <b>-6.10±0.03</b>  | -7.03±0.36         | -6.35±0.23         | -6.14±0.02         | -7.75±0.57         | -6.92±0.41         | -6.55±0.33         | -6.15±0.02         |
|       | <b>-6.10±0.03</b>  | -6.76±0.23         | -6.26±0.13         | -6.11±0.02         | -7.16±0.31         | -6.59±0.21         | -6.37±0.17         | -6.12±0.02         |
|       | <b>-6.09±0.00</b>  | -7.03±0.58         | -6.42±0.26         | -6.12±0.01         | -7.57±0.84         | -6.69±0.35         | -6.36±0.06         | -6.14±0.02         |
|       | <b>-6.09±0.00</b>  | -6.70±0.31         | -6.27±0.13         | -6.10±0.00         | -6.77±0.31         | -6.40±0.13         | -6.27±0.03         | -6.10±0.01         |
| MSNBC | <b>-6.18±0.04</b>  | -6.68±0.06         | -6.38±0.07         | -6.21±0.03         | -6.78±0.06         | -6.70±0.07         | -6.54±0.10         | -6.22±0.03         |
|       | <b>-6.18±0.04</b>  | -6.51±0.06         | -6.29±0.06         | -6.19±0.03         | -6.62±0.05         | -6.49±0.08         | -6.36±0.08         | -6.19±0.03         |
|       | <b>-6.21±0.02</b>  | -6.72±0.08         | -6.45±0.10         | -6.25±0.02         | -6.75±0.07         | -6.73±0.09         | -6.62±0.08         | -6.26±0.04         |
|       | <b>-6.21±0.02</b>  | -6.50±0.06         | -6.33±0.06         | -6.23±0.02         | -6.57±0.04         | -6.49±0.06         | -6.40±0.06         | -6.24±0.04         |

|           |                    |                    |                    |                    |                    |                    |                    |                    |
|-----------|--------------------|--------------------|--------------------|--------------------|--------------------|--------------------|--------------------|--------------------|
| KDD       | <b>-2.21±0.01</b>  | -2.23±0.02         | <b>-2.21±0.01</b>  | <b>-2.21±0.00</b>  | -2.24±0.02         | -2.22±0.01         | <b>-2.21±0.01</b>  | <b>-2.21±0.01</b>  |
|           | -2.22±0.01         | -2.23±0.02         | -2.22±0.01         | -2.22±0.01         | -2.23±0.02         | <b>-2.21±0.01</b>  | <b>-2.21±0.01</b>  | -2.22±0.01         |
|           | -2.20±0.00         | -2.24±0.02         | -2.21±0.01         | <b>-2.19±0.00</b>  | -2.28±0.04         | -2.24±0.03         | -2.21±0.01         | -2.20±0.00         |
|           | <b>-2.20±0.00</b>  | -2.24±0.02         | -2.21±0.01         | <b>-2.20±0.00</b>  | -2.26±0.03         | -2.22±0.02         | <b>-2.20±0.01</b>  | <b>-2.20±0.00</b>  |
| PLANTS    | -13.83±0.15        | -15.15±0.63        | -14.02±0.26        | -13.67±0.17        | -16.50±0.90        | -14.98±0.60        | -14.33±0.49        | <b>-13.56±0.09</b> |
|           | -14.11±0.14        | -15.26±0.34        | -14.26±0.21        | -13.97±0.09        | -16.22±0.71        | -14.94±0.45        | -14.41±0.26        | <b>-13.96±0.13</b> |
|           | -14.93±0.00        | -15.55±0.59        | -14.75±0.25        | <b>-14.55±0.04</b> | -15.55±0.81        | -14.91±0.31        | -14.67±0.07        | -14.52±0.05        |
|           | -14.93±0.01        | -15.37±0.47        | -14.82±0.16        | -14.67±0.03        | -15.25±0.34        | -14.86±0.15        | -14.73±0.05        | <b>-14.59±0.05</b> |
| AUDIO     | -42.54±0.10        | -42.36±0.24        | -42.30±0.21        | -42.38±0.12        | -42.98±0.44        | -42.33±0.29        | <b>-42.20±0.20</b> | -42.32±0.13        |
|           | <b>-42.63±0.11</b> | -43.05±0.24        | -42.78±0.13        | -42.67±0.15        | -43.44±0.35        | -42.97±0.22        | -42.85±0.25        | -42.65±0.14        |
|           | <b>-41.96±0.00</b> | -42.31±0.47        | -42.13±0.16        | -42.08±0.03        | -43.07±0.71        | -42.58±0.38        | -42.22±0.26        | -42.11±0.03        |
|           | <b>-41.97±0.00</b> | -42.67±0.44        | -42.29±0.16        | -42.16±0.03        | -43.00±0.51        | -42.73±0.31        | -42.49±0.24        | -42.25±0.03        |
| JESTER    | -55.94±0.21        | -55.52±0.34        | -55.62±0.23        | -55.73±0.14        | -56.26±0.49        | -55.65±0.34        | <b>-55.47±0.29</b> | -55.61±0.21        |
|           | -56.09±0.22        | -56.59±0.38        | -56.25±0.25        | -56.06±0.15        | -56.85±0.45        | -56.37±0.37        | -56.19±0.33        | <b>-56.00±0.23</b> |
|           | -54.89±0.00        | -55.15±0.52        | -54.86±0.22        | -54.84±0.02        | -56.11±0.69        | -55.20±0.32        | -54.95±0.33        | <b>-54.67±0.00</b> |
|           | <b>-54.94±0.00</b> | -55.72±0.45        | -55.16±0.23        | -55.01±0.02        | -56.12±0.52        | -55.59±0.29        | -55.42±0.31        | -54.93±0.01        |
| NETFLIX   | -59.28±0.10        | -59.23±0.20        | -59.22±0.13        | <b>-59.21±0.13</b> | -60.08±0.31        | -59.44±0.19        | -59.22±0.17        | -59.22±0.13        |
|           | -59.29±0.10        | -59.79±0.17        | -59.43±0.15        | <b>-59.28±0.13</b> | -60.26±0.24        | -59.82±0.14        | -59.57±0.16        | -59.33±0.12        |
|           | <b>-58.72±0.00</b> | -59.17±0.51        | -58.88±0.15        | -58.79±0.02        | -60.29±0.72        | -59.27±0.27        | -58.99±0.31        | -58.87±0.01        |
|           | <b>-58.73±0.00</b> | -59.37±0.36        | -58.99±0.17        | -58.84±0.01        | -59.85±0.41        | -59.34±0.20        | -59.17±0.21        | -58.97±0.01        |
| ACCIDENTS | -31.90±0.27        | -32.76±0.38        | -32.03±0.34        | <b>-31.84±0.24</b> | -33.83±0.63        | -32.77±0.40        | -32.31±0.34        | -31.92±0.27        |
|           | <b>-31.88±0.37</b> | -32.76±0.36        | -32.09±0.34        | -31.91±0.25        | -33.77±0.56        | -32.72±0.35        | -32.32±0.33        | -32.03±0.28        |
|           | <b>-31.01±0.00</b> | -32.02±0.37        | -31.35±0.01        | -31.35±0.01        | -34.40±1.02        | -32.06±0.28        | -31.38±0.22        | -31.17±0.21        |
|           | <b>-31.03±0.00</b> | -31.88±0.24        | -31.35±0.01        | -31.35±0.01        | -32.78±0.44        | -31.73±0.13        | -31.30±0.15        | -31.15±0.08        |
| RETAIL    | <b>-10.95±0.00</b> | -10.96±0.02        | -10.96±0.02        | -10.96±0.02        | -11.01±0.04        | -11.02±0.04        | -11.02±0.03        | -11.02±0.03        |
|           | <b>-10.95±0.00</b> | -10.96±0.01        | -10.96±0.01        | -10.96±0.01        | -10.99±0.04        | -11.00±0.03        | -11.00±0.03        | -11.00±0.03        |
|           | <b>-10.97±0.00</b> | -11.17±0.09        | -11.04±0.07        | -10.98±0.00        | -11.24±0.09        | -11.11±0.07        | -11.06±0.03        | -11.01±0.01        |
|           | <b>-10.98±0.00</b> | -11.06±0.09        | -10.99±0.01        | -10.99±0.00        | -11.07±0.07        | -11.02±0.05        | -11.00±0.01        | -11.00±0.01        |
| PUMSB     | -25.95±0.48        | -27.32±0.76        | -26.00±0.47        | -25.69±0.37        | -28.37±0.74        | -27.03±0.65        | -26.18±0.57        | <b>-25.62±0.27</b> |
|           | -26.14±0.52        | -27.42±0.88        | -26.18±0.46        | <b>-25.90±0.41</b> | -28.29±0.68        | -27.04±0.62        | -26.27±0.58        | -25.92±0.37        |
|           | -27.06±0.00        | -27.19±0.06        | -27.19±0.06        | -27.19±0.06        | -26.65±0.47        | <b>-26.55±0.50</b> | <b>-26.55±0.50</b> | <b>-26.55±0.50</b> |
|           | -27.06±0.00        | -27.19±0.06        | -27.19±0.06        | -27.19±0.06        | -26.66±0.48        | <b>-26.56±0.51</b> | <b>-26.56±0.51</b> | <b>-26.56±0.51</b> |
| DNA       | <b>-87.74±0.12</b> | -87.79±0.11        | -87.79±0.11        | -87.79±0.11        | -87.92±0.11        | -87.92±0.11        | -87.92±0.11        | -87.92±0.11        |
|           | <b>-87.75±0.12</b> | -87.79±0.08        | -87.79±0.08        | -87.79±0.08        | -87.95±0.10        | -87.95±0.10        | -87.95±0.10        | -87.95±0.10        |
|           | <b>-87.46±0.00</b> | -87.53±0.00        | -87.53±0.00        | -87.53±0.00        | -87.54±0.00        | -87.54±0.00        | -87.54±0.00        | -87.54±0.00        |
|           | <b>-87.46±0.00</b> | -87.53±0.00        | -87.53±0.00        | -87.53±0.00        | -87.47±0.00        | -87.47±0.00        | -87.47±0.00        | -87.47±0.00        |
| KOSAREK   | -11.25±0.07        | -11.11±0.06        | -11.09±0.09        | -11.12±0.08        | -11.08±0.08        | <b>-11.03±0.05</b> | -11.04±0.06        | -11.04±0.06        |
|           | -11.38±0.08        | -11.35±0.10        | -11.31±0.08        | -11.34±0.08        | -11.34±0.10        | <b>-11.29±0.08</b> | <b>-11.29±0.09</b> | <b>-11.29±0.09</b> |
|           | -10.97±0.00        | -11.23±0.22        | -11.05±0.16        | <b>-10.92±0.02</b> | -11.40±0.15        | -11.16±0.14        | -11.04±0.06        | -10.96±0.01        |
|           | -11.01±0.00        | -11.25±0.14        | -11.06±0.09        | <b>-10.99±0.01</b> | -11.42±0.14        | -11.20±0.14        | -11.08±0.05        | -11.03±0.00        |
| MSWEB     | <b>-10.19±0.02</b> | <b>-10.19±0.02</b> | <b>-10.19±0.02</b> | <b>-10.19±0.02</b> | <b>-10.19±0.02</b> | <b>-10.19±0.02</b> | <b>-10.19±0.02</b> | <b>-10.19±0.02</b> |
|           | <b>-10.19±0.01</b> | <b>-10.19±0.02</b> | <b>-10.19±0.02</b> | <b>-10.19±0.02</b> | -10.20±0.02        | -10.20±0.02        | -10.20±0.03        | -10.20±0.03        |
|           | <b>-10.12±0.00</b> | -10.43±0.13        | -10.13±0.03        | <b>-10.12±0.01</b> | -10.65±0.14        | -10.44±0.13        | -10.27±0.11        | -10.13±0.02        |
|           | <b>-10.12±0.00</b> | -10.31±0.07        | -10.15±0.02        | -10.15±0.00        | -10.38±0.06        | -10.29±0.06        | -10.20±0.05        | -10.13±0.01        |
| BOOK      | -37.66±0.32        | -37.14±0.32        | -37.34±0.40        | -37.34±0.40        | -36.73±0.37        | <b>-36.68±0.34</b> | <b>-36.68±0.34</b> | -36.68±0.34        |
|           | -37.79±0.19        | -37.69±0.21        | -37.69±0.21        | -37.69±0.21        | -37.51±0.29        | <b>-37.50±0.21</b> | <b>-37.50±0.21</b> | <b>-37.50±0.21</b> |
|           | -36.35±0.00        | -36.00±0.17        | -36.00±0.17        | -36.00±0.17        | <b>-35.90±0.00</b> | <b>-35.90±0.00</b> | <b>-35.90±0.00</b> | <b>-35.90±0.00</b> |
|           | -36.97±0.00        | -36.83±0.10        | -36.83±0.10        | -36.83±0.10        | -36.60±0.00        | <b>-36.60±0.00</b> | <b>-36.60±0.00</b> | <b>-36.60±0.00</b> |

|         |                    |                     |                     |                     |                     |                     |                     |                     |
|---------|--------------------|---------------------|---------------------|---------------------|---------------------|---------------------|---------------------|---------------------|
| EMOVIE  | -62.19±2.13        | -60.61±1.69         | -60.98±1.87         | -61.38±1.99         | -59.78±1.95         | -59.64±1.92         | -59.41±2.01         | <b>-59.20±1.21</b>  |
|         | -63.91±1.24        | -63.37±1.41         | -63.46±1.31         | -63.46±1.31         | -62.86±1.54         | <b>-62.62±1.58</b>  | -62.72±1.30         | -62.74±1.31         |
|         | -59.07±0.01        | -58.44±0.54         | -57.94±0.39         | -57.80±0.15         | -57.90±0.89         | -58.06±0.20         | <b>-57.71±0.57</b>  | -57.98±0.00         |
|         | -60.56±0.00        | -60.86±0.24         | -60.49±0.06         | -60.49±0.06         | <b>-59.99±0.65</b>  | -60.47±0.22         | -60.35±0.00         | -60.35±0.00         |
| WEBKB   | -163.31±0.35       | -162.82±0.88        | -162.88±0.88        | -162.88±0.88        | <b>-162.42±1.10</b> | -162.53±0.92        | -162.44±1.00        | -162.44±1.00        |
|         | -163.43±0.23       | <b>-163.33±0.29</b> | <b>-163.33±0.29</b> | <b>-163.33±0.29</b> | -163.33±0.34        | -163.33±0.34        | -163.33±0.34        | -163.33±0.34        |
|         | -159.56±0.00       | -158.44±0.35        | -159.11±0.41        | -159.11±0.41        | <b>-158.30±0.09</b> | -158.52±0.63        | -158.48±0.00        | -158.48±0.00        |
|         | -161.30±0.00       | -161.19±0.22        | -161.91±0.09        | -161.91±0.09        | <b>-160.93±0.29</b> | -161.26±0.00        | -161.26±0.00        | -161.26±0.00        |
| ROUTERS | -94.05±0.69        | -93.45±1.15         | -93.69±1.13         | -93.71±1.11         | <b>-93.00±1.34</b>  | -93.13±0.80         | -93.12±0.84         | -93.12±0.84         |
|         | -94.32±0.33        | -94.32±0.51         | <b>-94.29±0.37</b>  | <b>-94.29±0.37</b>  | -94.29±0.48         | -94.29±0.48         | -94.29±0.48         | -94.29±0.48         |
|         | -88.13±0.00        | -87.94±0.52         | -87.95±0.45         | -87.95±0.45         | -88.89±0.80         | -88.18±0.61         | -87.91±0.52         | <b>-87.91±0.29</b>  |
|         | <b>-88.92±0.00</b> | -89.71±0.58         | -89.33±0.42         | -89.33±0.42         | -90.66±0.55         | -90.58±0.65         | -89.47±0.35         | -89.43±0.18         |
| 20NEWS  | -162.96±1.12       | -161.58±0.77        | -162.04±0.96        | -162.04±0.96        | <b>-160.73±0.56</b> | -161.06±0.67        | -161.06±0.63        | -161.06±0.63        |
|         | -164.26±0.61       | <b>-163.81±0.53</b> | -163.95±0.44        | -163.95±0.44        | -163.86±0.84        | -163.95±0.85        | -164.03±0.87        | -164.03±0.87        |
|         | -158.38±0.00       | <b>-157.31±0.58</b> | -157.55±0.43        | -157.44±0.16        | -157.79±0.80        | -157.86±0.41        | -157.71±0.52        | -158.16±0.01        |
|         | -159.58±0.00       | -160.61±1.07        | -159.73±0.46        | <b>-159.37±0.17</b> | -161.12±0.65        | -160.68±0.44        | -160.41±0.42        | -160.20±0.01        |
| BBC     | -261.88±0.34       | <b>-261.81±0.28</b> | <b>-261.81±0.28</b> | <b>-261.81±0.28</b> | -261.96±0.48        | -261.96±0.48        | -261.96±0.48        | -261.96±0.48        |
|         | -262.04±0.77       | <b>-261.96±0.58</b> | <b>-261.96±0.58</b> | <b>-261.96±0.58</b> | -262.24±0.98        | -262.24±0.98        | -262.24±0.98        | -262.24±0.98        |
|         | -262.33±0.00       | -260.52±0.00        | -260.52±0.00        | -260.52±0.00        | -259.45±1.26        | <b>-258.79±0.00</b> | <b>-258.79±0.00</b> | <b>-258.79±0.00</b> |
|         | -262.91±0.00       | -261.41±0.00        | -261.41±0.00        | -261.41±0.00        | <b>-260.62±0.00</b> | <b>-260.62±0.00</b> | <b>-260.62±0.00</b> | <b>-260.62±0.00</b> |
| AD      | -16.40±0.04        | <b>-16.38±0.11</b>  | <b>-16.38±0.11</b>  | <b>-16.38±0.11</b>  | -16.40±0.12         | -16.40±0.12         | -16.40±0.12         | -16.40±0.12         |
|         | -16.62±0.13        | <b>-16.61±0.13</b>  | <b>-16.61±0.13</b>  | <b>-16.61±0.13</b>  | -16.66±0.26         | -16.66±0.26         | -16.66±0.26         | -16.66±0.26         |
|         | -16.02±0.00        | -16.02±0.00         | -16.02±0.00         | -16.02±0.00         | -16.26±0.10         | -16.26±0.10         | -16.05±0.20         | <b>-15.97±0.08</b>  |
|         | <b>-16.28±0.00</b> | <b>-16.28±0.00</b>  | <b>-16.28±0.00</b>  | <b>-16.28±0.00</b>  | -16.39±0.07         | -16.39±0.07         | -16.39±0.07         | -16.39±0.07         |

## D.2 TRAINING TIME AND CIRCUIT SIZES

The training time and the circuit size for our models are reported in Table 5.

Table 5: Each row reports  $\delta$ -values/training times in seconds (top) and circuit sizes (bottom) obtained for learning for the best XPC models reported in Table 4.

| DATASET    | XPC         | XPC <sub>Det</sub> | XPC <sup>SD</sup> | XPC <sup>SD</sup> <sub>Det</sub> |
|------------|-------------|--------------------|-------------------|----------------------------------|
| NLTC5      | 64 / 0.06   | 64 / 0.08          | 64 / 0.05         | 64 / 0.05                        |
|            | 2765±458    | 2765±458           | 4335±67           | 4401±67                          |
| MSNBC      | 512 / 0.36  | 512 / 0.71         | 512 / 0.31        | 512 / 0.31                       |
|            | 3575±546    | 3575±546           | 4887±125          | 4887±125                         |
| KDD        | 64 / 1.29   | 128 / 2.09         | 128 / 0.64        | 128 / 1.02                       |
|            | 21331±1591  | 16089±1312         | 12951±109         | 13040±109                        |
| PLANTS     | 64 / 0.25   | 128 / 0.18         | 64 / 0.12         | 128 / 0.1                        |
|            | 31403±1301  | 19138±2135         | 22242±532         | 13960±644                        |
| AUDIO      | 256 / 0.18  | 512 / 0.12         | 128 / 0.17        | 128 / 0.17                       |
|            | 20897±1232  | 11396±740          | 29275±42          | 29317±42                         |
| JESTER     | 512 / 0.06  | 256 / 0.11         | 128 / 0.13        | 128 / 0.11                       |
|            | 6530±722    | 12584±870          | 25351±69          | 20273±29                         |
| NETFLIX    | 256 / 0.17  | 512 / 0.12         | 128 / 0.21        | 128 / 0.21                       |
|            | 20239±1655  | 12510±976          | 39811±57          | 39868±57                         |
| ACCIDENTS  | 256 / 0.15  | 256 / 0.09         | 128 / 0.09        | 128 / 0.09                       |
|            | 16252±2742  | 8994±2417          | 11906±15          | 11921±15                         |
| RETAIL     | 512 / 0.04  | 512 / 0.04         | 512 / 0.09        | 512 / 0.09                       |
|            | 1098±416    | 1098±416           | 6645±7            | 6651±7                           |
| PUMSB-STAR | 128 / 0.45  | 128 / 0.35         | 128 / 0.1         | 128 / 0.12                       |
|            | 43737±6494  | 32356±7266         | 8703±1442         | 8866±1480                        |
| DNA        | 256 / 0.04  | 256 / 0.04         | 512 / 0.02        | 512 / 0.02                       |
|            | 3927±888    | 3927±888           | 2615±1            | 2616±1                           |
| KOSAREK    | 256 / 0.28  | 256 / 0.29         | 256 / 0.27        | 256 / 0.3                        |
|            | 13730±3381  | 13617±2872         | 20898±34          | 20938±34                         |
| MSWEB      | 512 / 0.13  | 512 / 0.13         | 512 / 0.27        | 512 / 0.27                       |
|            | 2298±714    | 2298±714           | 12130±5           | 12135±5                          |
| BOOK       | 256 / 0.37  | 256 / 0.35         | 256 / 0.39        | 256 / 0.38                       |
|            | 11610±4205  | 11227±4306         | 13505±4           | 13678±28                         |
| EACHMOVIE  | 128 / 0.53  | 256 / 0.31         | 64 / 1.58         | 256 / 0.5                        |
|            | 19913±8846  | 11375±5785         | 80294±9009        | 21369±3124                       |
| WEBKB      | 256 / 0.89  | 512 / 0.42         | 128 / 2.59        | 512 / 0.87                       |
|            | 17026±6503  | 7719±3334          | 61915±13804       | 17122±2                          |
| ROUTERS-52 | 128 / 2.88  | 512 / 0.65         | 256 / 2.91        | 512 / 1.52                       |
|            | 55112±18036 | 10479±5049         | 67594±2067        | 36440±5                          |
| 20NEWS-GRP | 512 / 2.11  | 512 / 2.2          | 512 / 3.28        | 512 / 3.34                       |
|            | 37138±10983 | 38557±10433        | 65838±2880        | 65881±2884                       |
| BBC        | 512 / 0.49  | 512 / 0.51         | 128 / 1.86        | 256 / 0.77                       |
|            | 7755±1930   | 7755±1932          | 36578±6           | 14578±1                          |
| AD         | 64 / 0.94   | 64 / 1.01          | 16 / 21.59        | 128 / 1.69                       |
|            | 11661±2170  | 12368±3157         | 298553±10013      | 22093±20                         |

## E MIXTURE MODELS

### E.1 EXPCS

The best average test-set log-likelihoods for every EXPC type are reported in Table 6.

Table 6: Best average test-set log-likelihoods for every EXPC type in the space formed by  $l = \{1, 2, 3\}$ ,  $k = \{2, 3, 4, 8\}$ ,  $\delta = \{16, 32, 64, 128, 256, 512\}$  and  $M = \{2, 5, 10, 15, 20, 25, 30, 40\}$ . For every dataset, each row corresponds (from top to down) to: EXPC, EXPC<sub>Det</sub>, EXPC<sup>SD</sup> and EXPC<sub>Det</sub><sup>SD</sup>.

|                 | $l = 1$       |               | $l = 2$       |               | $l = 3$       |               |               |               |
|-----------------|---------------|---------------|---------------|---------------|---------------|---------------|---------------|---------------|
|                 | $k = 2$       | $k = 2$       | $k = 3$       | $k = 4$       | $k = 2$       | $k = 3$       | $k = 4$       | $k = 8$       |
| NLTC5           | -6.00         | -6.30         | -6.04         | -6.00         | -6.54         | -6.20         | -6.10         | <b>-6.01</b>  |
|                 | <b>-6.00</b>  | -6.26         | -6.04         | -6.00         | -6.48         | -6.18         | -6.09         | -6.01         |
|                 | -             | -6.43         | -6.09         | <b>-6.05</b>  | -6.50         | -6.29         | -6.15         | -6.10         |
| MSNBC           | -             | -6.38         | -6.08         | <b>-6.05</b>  | -6.42         | -6.23         | -6.11         | -6.08         |
|                 | <b>-6.12</b>  | -6.40         | -6.19         | -6.12         | -6.56         | -6.38         | -6.25         | -6.12         |
|                 | <b>-6.12</b>  | -6.35         | -6.17         | -6.12         | -6.46         | -6.33         | -6.21         | -6.12         |
| KDD             | -             | -6.43         | -6.22         | <b>-6.18</b>  | -6.54         | -6.44         | -6.33         | -6.19         |
|                 | -             | -6.38         | -6.20         | <b>-6.17</b>  | -6.48         | -6.38         | -6.29         | -6.19         |
|                 | -2.13         | -2.14         | -2.13         | <b>-2.13</b>  | -2.13         | -2.13         | -2.13         | -2.13         |
| PLANTS          | -2.13         | -2.13         | -2.13         | <b>-2.14</b>  | -2.13         | -2.13         | -2.13         | -2.13         |
|                 | -             | -2.15         | -2.17         | -2.19         | -2.17         | <b>-2.15</b>  | -2.16         | -2.18         |
|                 | -             | -2.15         | -2.17         | -2.20         | -2.17         | <b>-2.16</b>  | -2.16         | -2.19         |
| AUDIO           | -12.41        | -13.14        | -12.53        | -12.35        | -13.91        | -13.03        | -12.59        | <b>-12.24</b> |
|                 | -12.41        | -13.11        | -12.51        | -12.35        | -13.78        | -12.96        | -12.57        | <b>-12.24</b> |
|                 | -             | -14.73        | <b>-14.19</b> | -14.55        | -14.82        | -14.45        | -14.39        | -14.46        |
| JESTER          | -             | -14.61        | <b>-14.21</b> | -14.62        | -14.76        | -14.46        | -14.43        | -14.50        |
|                 | -39.84        | -40.03        | -39.80        | -39.78        | -40.46        | -40.06        | -39.89        | <b>-39.75</b> |
|                 | -39.84        | -40.12        | -39.86        | -39.80        | -40.53        | -40.14        | -39.97        | <b>-39.77</b> |
| NETFLIX         | -             | -40.96        | -40.96        | -41.74        | -41.66        | <b>-40.91</b> | -40.96        | -41.91        |
|                 | -             | -41.00        | -41.05        | -41.76        | -41.65        | <b>-40.97</b> | -41.07        | -42.01        |
|                 | -52.72        | -52.89        | -52.65        | -52.67        | -53.27        | -52.89        | -52.73        | <b>-52.60</b> |
| RETAILACCIDENTS | -52.72        | -52.96        | -52.75        | -52.68        | -53.35        | -52.97        | -52.84        | <b>-52.63</b> |
|                 | -             | <b>-53.43</b> | -53.52        | -54.59        | -54.01        | -53.49        | -53.41        | -54.68        |
|                 | -             | <b>-53.51</b> | -53.68        | -54.63        | -54.03        | -53.61        | -53.59        | -54.76        |
| PUMSB           | -56.43        | -56.79        | -56.50        | <b>-56.38</b> | -57.39        | -56.77        | -56.64        | -56.41        |
|                 | -56.43        | -56.93        | -56.58        | <b>-56.40</b> | -57.41        | -56.88        | -56.75        | -56.43        |
|                 | -             | -57.66        | -57.68        | -58.46        | -58.18        | -57.67        | <b>-57.58</b> | -58.60        |
| KOSAREK         | -             | -57.68        | -57.80        | -58.46        | -58.14        | -57.73        | <b>-57.69</b> | -58.62        |
|                 | -29.63        | -30.63        | -29.76        | <b>-29.54</b> | -31.33        | -30.35        | -29.97        | -29.55        |
|                 | -29.63        | -30.58        | -29.74        | -29.53        | -31.28        | -30.31        | -29.93        | <b>-29.54</b> |
| DNA             | -             | -31.71        | -31.36        | -31.36        | -33.12        | -31.45        | <b>-31.02</b> | -31.08        |
|                 | -             | -31.60        | -31.36        | -31.36        | -31.99        | -31.32        | <b>-30.99</b> | -31.08        |
|                 | -10.83        | -10.82        | -10.82        | -10.82        | -10.81        | -10.81        | <b>-10.81</b> | -10.81        |
| NETFLIX         | -10.83        | -10.81        | -10.81        | -10.81        | -10.81        | <b>-10.80</b> | -10.79        | -10.79        |
|                 | -             | -10.94        | -10.96        | -10.97        | -11.00        | -10.94        | <b>-10.94</b> | -10.96        |
|                 | -             | -10.91        | -10.95        | -10.98        | <b>-10.90</b> | -10.91        | -10.95        | -10.97        |
| RETAILACCIDENTS | -23.78        | -24.87        | -23.86        | -23.58        | -25.61        | -24.56        | -23.90        | <b>-23.55</b> |
|                 | -23.78        | -24.78        | -23.83        | -23.57        | -25.49        | -24.44        | -23.85        | <b>-23.53</b> |
|                 | -             | -27.21        | -27.21        | -27.21        | -26.16        | <b>-26.06</b> | -26.06        | -26.06        |
| KOSAREK         | -             | -27.21        | -27.21        | -27.21        | -26.16        | <b>-26.05</b> | -26.05        | -26.05        |
|                 | <b>-84.83</b> | -85.75        | -85.47        | -85.47        | -86.25        | -85.69        | -85.62        | -85.53        |
|                 | <b>-84.83</b> | -85.78        | -85.48        | -85.48        | -86.24        | -85.73        | -85.62        | -85.54        |
| NETFLIX         | -             | -87.25        | -87.53        | -87.53        | -86.72        | <b>-86.61</b> | -87.54        | -87.54        |
|                 | -             | -86.85        | -87.25        | -87.25        | <b>-85.09</b> | -86.30        | -87.47        | -87.47        |
|                 | -10.68        | -10.64        | -10.66        | -10.66        | -10.65        | -10.63        | <b>-10.61</b> | -10.62        |
| NETFLIX         | -10.68        | -10.66        | -10.66        | -10.66        | -10.67        | -10.64        | <b>-10.63</b> | -10.63        |
|                 | -             | -10.87        | <b>-10.77</b> | -10.89        | -11.04        | -10.85        | -10.81        | -10.96        |
|                 | -             | -10.86        | <b>-10.81</b> | -10.95        | -11.01        | -10.87        | -10.85        | -11.03        |

|         |                |         |              |                |                |                |               |               |
|---------|----------------|---------|--------------|----------------|----------------|----------------|---------------|---------------|
| MSWEB   | -10.09         | -9.94   | -9.90        | -9.90          | -9.84          | <b>-9.78</b>   | -9.78         | -9.77         |
|         | -10.09         | -9.94   | -9.90        | -9.90          | -9.84          | <b>-9.78</b>   | -9.78         | -9.78         |
|         | -              | -10.09  | <b>-9.93</b> | -10.07         | -10.24         | -10.05         | -9.97         | -10.05        |
|         | -              | -10.02  | <b>-9.94</b> | -10.12         | -10.06         | -9.97          | -9.93         | -10.09        |
| BOOK    | -35.72         | -35.16  | -35.23       | -35.23         | <b>-34.85</b>  | -35.02         | -35.02        | -35.02        |
|         | -35.63         | -35.40  | -35.40       | -35.40         | <b>-34.98</b>  | -35.16         | -35.16        | -35.16        |
|         | -              | -34.86  | -35.37       | -35.68         | <b>-34.75</b>  | -35.08         | -35.41        | -35.90        |
|         | -              | -35.25  | -36.28       | -36.28         | <b>-35.14</b>  | -35.71         | -36.60        | -36.60        |
| EMOVIE  | -54.50         | -53.78  | -53.78       | -53.87         | -53.08         | -53.23         | -53.15        | <b>-52.93</b> |
|         | -54.65         | -54.06  | -54.13       | -54.30         | -53.35         | -53.65         | <b>-53.44</b> | -53.45        |
|         | -              | -55.35  | -56.05       | -57.27         | -55.23         | <b>-54.82</b>  | -55.42        | -57.98        |
|         | -              | -55.88  | -57.39       | -60.15         | <b>-55.26</b>  | -55.70         | -56.47        | -60.35        |
| WEBKB   | -153.97        | -153.92 | -155.16      | -155.23        | <b>-154.03</b> | -153.93        | -154.17       | -154.17       |
|         | -154.29        | -154.36 | -155.33      | -155.49        | <b>-154.42</b> | -154.49        | -154.66       | -154.66       |
|         | -              | -153.62 | -157.22      | -157.22        | <b>-153.67</b> | -154.17        | -156.28       | -157.89       |
|         | -              | -154.45 | -159.88      | -159.88        | <b>-154.23</b> | -155.58        | -158.22       | -161.26       |
| ROUTERS | -85.61         | -85.32  | -85.71       | -85.28         | -85.07         | <b>-84.82</b>  | -85.31        | -85.04        |
|         | -85.89         | -85.96  | -86.12       | -85.72         | -85.53         | <b>-85.27</b>  | -85.74        | -85.65        |
|         | -              | -85.19  | -85.17       | -86.48         | -85.38         | <b>-84.70</b>  | -85.02        | -86.94        |
|         | -              | -85.51  | -85.93       | -87.25         | -85.49         | <b>-85.09</b>  | -85.96        | -88.61        |
| 20NEWS  | -154.48        | -153.98 | -154.47      | -154.35        | -153.85        | <b>-154.13</b> | -154.45       | -154.48       |
|         | -154.60        | -154.54 | -154.80      | <b>-154.71</b> | -154.64        | -154.91        | -155.09       | -155.07       |
|         | -              | -153.78 | -155.10      | -156.86        | <b>-153.75</b> | -154.02        | -154.52       | -157.26       |
|         | -              | -154.35 | -156.26      | -158.63        | <b>-154.21</b> | -154.56        | -155.49       | -160.10       |
| BBC     | <b>-237.96</b> | -242.58 | -243.68      | -243.72        | -250.91        | -251.07        | -251.33       | -251.33       |
|         | <b>-239.01</b> | -247.14 | -246.98      | -247.43        | -251.35        | -251.64        | -251.85       | -251.85       |
|         | -              | -248.43 | -253.19      | -260.52        | <b>-248.34</b> | -250.16        | -251.50       | -258.79       |
|         | -              | -249.46 | -255.95      | -261.41        | <b>-248.79</b> | -252.21        | -255.59       | -260.62       |
| AD      | -15.90         | -14.39  | -14.23       | -14.23         | -13.95         | <b>-13.61</b>  | -13.60        | -13.60        |
|         | -15.94         | -14.28  | -14.14       | -14.14         | -13.78         | <b>-13.45</b>  | -13.45        | -13.45        |
|         | -              | -16.03  | -16.03       | -16.03         | -15.66         | -15.59         | <b>-15.50</b> | -15.67        |
|         | -              | -16.31  | -16.31       | -16.31         | <b>-15.59</b>  | -15.73         | -15.68        | -15.87        |



## E.2 COMPETITORS

The average test-set log-likelihoods for best EXPCs are reported in Table 7.

Table 7: Average test-set log-likelihoods for best EXPCs, SOTA ensembling techniques and single model competitors. In the first half of the table the best results for ensembles of bagged (CNet<sup>40</sup>) and boosted (CNet<sup>40</sup><sub>boost</sub>) entropy based CNets taken from [Rahman and Gogate, 2016], ensembles of bagged CNets learned with dCSN and ensemble of extremely randomized CNets as in [Di Mauro et al., 2017]. The remaining columns report the comparison to other models employing more sophisticated models such as ID-SPN [Rooshenas and Lowd, 2014], RAT-SPN [Peharz et al., 2019], and Learn-SPN [Gens and Domingos, 2013].

| DATASET    | ensembles     |                     |                    |                                     |                    | competitors  |                |           |
|------------|---------------|---------------------|--------------------|-------------------------------------|--------------------|--------------|----------------|-----------|
|            | EXPC          | XCNet <sup>40</sup> | CNet <sup>40</sup> | CNet <sup>40</sup> <sub>boost</sub> | dCSN <sup>40</sup> | RAT          | ID-SPN         | Learn-SPN |
| NLTCS      | <b>-6.00</b>  | <b>-6.00</b>        | <b>-6.00</b>       | -6.01                               | <b>-6.00</b>       | -6.01        | -6.02          | -6.11     |
| MSNBC      | -6.12         | -6.06               | -6.08              | -6.15                               | -6.05              | <b>-6.04</b> | <b>-6.04</b>   | -6.11     |
| KDD        | <b>-2.12</b>  | -2.13               | -2.14              | -2.15                               | -2.15              | -2.13        | -2.13          | -2.18     |
| PLANTS     | -12.24        | <b>-11.99</b>       | -12.32             | -12.67                              | -12.59             | -13.44       | -12.54         | -12.99    |
| AUDIO      | <b>-39.75</b> | -39.77              | -40.09             | -39.84                              | -40.19             | -39.96       | -39.79         | -40.50    |
| JESTER     | <b>-52.51</b> | -52.65              | -52.88             | -52.82                              | -52.99             | -52.97       | -52.86         | -75.98    |
| NETFLIX    | -56.38        | -56.38              | -56.55             | -56.44                              | -56.69             | -56.85       | <b>-56.36</b>  | -57.33    |
| ACCIDENTS  | -29.54        | -29.31              | -29.88             | -29.45                              | -29.27             | -35.49       | -26.98         | -30.04    |
| RETAIL     | <b>-10.79</b> | -10.93              | -10.84             | -10.81                              | -11.17             | -10.91       | -10.85         | -11.04    |
| PUMSB-STAR | -23.53        | -23.44              | -23.98             | -23.46                              | -23.78             | -32.53       | -22.41         | -24.78    |
| DNA        | -84.83        | -84.96              | -81.07             | -85.67                              | -85.95             | -97.23       | -81.21         | -82.52    |
| KOSAREK    | -10.61        | -10.72              | -10.74             | <b>-10.60</b>                       | -10.97             | -10.89       | <b>-10.60</b>  | -10.99    |
| MSWEB      | -9.78         | <b>-9.66</b>        | -9.77              | -9.74                               | -9.93              | -10.12       | -9.73          | -10.25    |
| BOOK       | <b>-34.14</b> | -36.35              | -35.55             | -34.46                              | -37.38             | -34.68       | <b>-34.14</b>  | -35.89    |
| EACHMOVIE  | -52.38        | -51.72              | -53.00             | -51.53                              | -54.14             | -53.63       | <b>-51.51</b>  | -52.49    |
| WEBKB      | -152.44       | -153.01             | -153.12            | -152.53                             | -155.47            | -157.53      | <b>-151.84</b> | -158.21   |
| ROUTERS-52 | -84.70        | -84.05              | -83.71             | -83.69                              | -86.19             | -87.37       | <b>-83.35</b>  | -85.07    |
| 20NEWS-GRP | -152.26       | -153.89             | -156.09            | -153.12                             | -156.46            | -152.06      | <b>-151.47</b> | -155.93   |
| BBC        | -237.96       | -238.47             | <b>-237.42</b>     | -247.01                             | -248.84            | -252.14      | -248.93        | -250.69   |
| AD         | <b>-13.45</b> | -14.20              | -15.28             | -14.36                              | -15.55             | -48.47       | -19.05         | -19.73    |
| AVG. RANK  | <b>2.00</b>   | 2.25                | 3.25               | 2.85                                | 4.25               |              |                |           |
|            | 2.75          | 3.15                | 4.3                | 3.8                                 | 5.85               | 6            | <b>2.5</b>     | 6.9       |

## References

- C. K. Chow and C. N. Liu. Approximating discrete probability distributions with dependence trees. *IEEE Trans. Inf. Theory*, 14(3):462–467, 1968.
- Nicola Di Mauro, Antonio Vergari, Teresa Maria Altomare Basile, and Floriana Esposito. Fast and accurate density estimation with extremely randomized cutset networks. In *ECML*, pages 203–219, 2017.
- Robert Gens and Pedro Domingos. Learning the structure of sum-product networks. In *ICML*, pages 873–880, 2013.
- Jan Van Haaren and Jesse Davis. Markov network structure learning: A randomized feature generation approach. In *AAAI*, 2012.
- Robert Peharz, Antonio Vergari, Karl Stelzner, Alejandro Molina, Martin Trapp, Xiaoting Shao, Kristian Kersting, and Zoubin Ghahramani. Random sum-product networks: A simple and effective approach to probabilistic deep learning. In *UAI*, volume 115, pages 334–344, 2019.
- Tahrira Rahman and Vibhav Gogate. Learning ensembles of cutset networks. In *AAAI*, pages 3301–3307, 2016.
- Amirmohammad Rooshenas and Daniel Lowd. Learning sum-product networks with direct and indirect variable interactions. In *ICML*, pages 710–718, 2014.
